# Supplementary material for: The Intestinal Effect of Atorvastatin: Akkermansia muciniphila and Barrier Function
Source: Front Microbiol. 2022 Feb 2;12:797062. doi: 10.3389/fmicb.2021.797062 (PMC8847773; doi:10.3389/fmicb.2021.797062)
Supplement: Supplementary file 2 [file Table_2.xls]

## Sheet: Sheet1
Relative abundance of the differential microorganisms between the two groups
Phylum level
Domain	Kingdom	Phylum	SUM	Percent	A1	A2	A3	A4	A5	A6	H1	H2	H3	H4	H5	H6
d__Bacteria	k__norank_d__Bacteria	p__Verrucomicrobiota	1402	1	0	0	0	0	0	0	847	4	20	63	468	0
Family level
Domain	Kingdom	Phylum	Class	Order	Family	SUM	Percent	A1	A2	A3	A4	A5	A6	H1	H2	H3	H4	H5	H6
d__Bacteria	k__norank_d__Bacteria	p__Firmicutes	c__Clostridia	o__Clostridia_UCG-014	f__norank_o__Clostridia_UCG-014	1238	0.024924	411	301	58	49	33	96	29	162	21	34	32	12
d__Bacteria	k__norank_d__Bacteria	p__Bacteroidota	c__Bacteroidia	o__Bacteroidales	f__Tannerellaceae	4049	0.081516	284	93	176	77	56	152	1284	297	543	608	398	81
d__Bacteria	k__norank_d__Bacteria	p__Firmicutes	c__Clostridia	o__Clostridia_vadinBB60_group	f__norank_o__Clostridia_vadinBB60_group	2746	0.055284	104	125	62	53	53	98	791	384	150	413	423	90
d__Bacteria	k__norank_d__Bacteria	p__Verrucomicrobiota	c__Verrucomicrobiae	o__Verrucomicrobiales	f__Akkermansiaceae	1402	0.028226	0	0	0	0	0	0	847	4	20	63	468	0
d__Bacteria	k__norank_d__Bacteria	p__Firmicutes	c__Clostridia	o__Christensenellales	f__Christensenellaceae	113	0.002275	0	0	4	6	6	9	6	14	18	16	18	16
d__Bacteria	k__norank_d__Bacteria	p__Firmicutes	c__Bacilli	o__Erysipelotrichales	f__Erysipelotrichaceae	2574	0.051821	288	213	1398	227	83	246	14	9	12	40	30	14
d__Bacteria	k__norank_d__Bacteria	p__Firmicutes	c__Bacilli	o__Mycoplasmatales	f__Mycoplasmataceae	24	0.000483	0	0	0	0	0	0	0	0	9	4	8	3
d__Bacteria	k__norank_d__Bacteria	p__Firmicutes	c__Clostridia	o__Oscillospirales	f__Oscillospiraceae	37525	0.755471	3166	4624	2545	3887	4230	3833	1491	2904	2132	2725	2451	3537
Genus level
Domain	Kingdom	Phylum	Class	Order	Family	Genus	SUM	Percent	A1	A2	A3	A4	A5	A6	H1	H2	H3	H4	H5	H6
d__Bacteria	k__norank_d__Bacteria	p__Firmicutes	c__Clostridia	o__Clostridia_vadinBB60_group	f__norank_o__Clostridia_vadinBB60_group	g__norank_f__norank_o__Clostridia_vadinBB60_group	2746	0.130743	104	125	62	53	53	98	791	384	150	413	423	90
d__Bacteria	k__norank_d__Bacteria	p__Bacteroidota	c__Bacteroidia	o__Bacteroidales	f__Tannerellaceae	g__Parabacteroides	4049	0.192782	284	93	176	77	56	152	1284	297	543	608	398	81
d__Bacteria	k__norank_d__Bacteria	p__Firmicutes	c__Clostridia	o__Peptostreptococcales-Tissierellales	f__Anaerovoracaceae	g__Anaerovorax	99	0.004714	4	15	8	27	10	14	0	4	3	8	3	3
d__Bacteria	k__norank_d__Bacteria	p__Firmicutes	c__Bacilli	o__Erysipelotrichales	f__Erysipelotrichaceae	g__Turicibacter	2574	0.122554	288	213	1398	227	83	246	14	9	12	40	30	14
d__Bacteria	k__norank_d__Bacteria	p__Firmicutes	c__Clostridia	o__Lachnospirales	f__Lachnospiraceae	g__Lachnoclostridium	1555	0.074037	193	218	244	104	237	78	67	68	47	107	109	83
d__Bacteria	k__norank_d__Bacteria	p__Firmicutes	c__Clostridia	o__Clostridia_UCG-014	f__norank_o__Clostridia_UCG-014	g__norank_f__norank_o__Clostridia_UCG-014	1238	0.058944	411	301	58	49	33	96	29	162	21	34	32	12
d__Bacteria	k__norank_d__Bacteria	p__Firmicutes	c__Bacilli	o__Mycoplasmatales	f__Mycoplasmataceae	g__Mycoplasma	24	0.001143	0	0	0	0	0	0	0	0	9	4	8	3
d__Bacteria	k__norank_d__Bacteria	p__Actinobacteriota	c__Coriobacteriia	o__Coriobacteriales	f__Eggerthellaceae	g__Parvibacter	50	0.002381	5	5	6	12	10	2	0	0	5	0	5	0
d__Bacteria	k__norank_d__Bacteria	p__Verrucomicrobiota	c__Verrucomicrobiae	o__Verrucomicrobiales	f__Akkermansiaceae	g__Akkermansia	1402	0.066752	0	0	0	0	0	0	847	4	20	63	468	0
d__Bacteria	k__norank_d__Bacteria	p__Firmicutes	c__Clostridia	o__Peptococcales	f__Peptococcaceae	g__Peptococcus	194	0.009237	8	25	19	0	0	0	17	29	9	27	28	32
d__Bacteria	k__norank_d__Bacteria	p__Firmicutes	c__Clostridia	o__Christensenellales	f__Christensenellaceae	g__norank_f__Christensenellaceae	110	0.005237	0	0	4	6	6	9	6	14	18	13	18	16
d__Bacteria	k__norank_d__Bacteria	p__Bacteroidota	c__Bacteroidia	o__Bacteroidales	f__Rikenellaceae	g__Rikenella	1903	0.090606	77	122	127	89	90	108	176	108	260	171	317	258
d__Bacteria	k__norank_d__Bacteria	p__Firmicutes	c__Clostridia	o__Oscillospirales	f__Ruminococcaceae	g__UBA1819	290	0.013808	25	66	32	65	41	59	0	0	0	0	1	1
d__Bacteria	k__norank_d__Bacteria	p__Firmicutes	c__Clostridia	o__Oscillospirales	f__Oscillospiraceae	g__Oscillibacter	4358	0.207494	439	458	442	457	580	477	138	336	187	248	283	313
d__Bacteria	k__norank_d__Bacteria	p__Firmicutes	c__Clostridia	o__Oscillospirales	f__Oscillospiraceae	g__UCG-003	150	0.007142	16	30	13	14	9	15	0	13	14	8	9	9
d__Bacteria	k__norank_d__Bacteria	p__Firmicutes	c__Clostridia	o__Oscillospirales	f__Ruminococcaceae	g__Eubacterium_siraeum_group	215	0.010237	46	32	18	27	43	49	0	0	0	0	0	0
d__Bacteria	k__norank_d__Bacteria	p__Firmicutes	c__Clostridia	o__Oscillospirales	f__Ruminococcaceae	g__Paludicola	46	0.00219	3	0	3	0	0	4	5	6	4	14	3	4
